# Supplementary material
Source: HighWire-hosted journal article supplement (https://www.cmajopen.ca/highwire/filestream/80854/field_highwire_adjunct_files/0/open-2014-0049-1-at.pdf)
Supplement: open-2014-0049-1-at.pdf [file open-2014-0049-1-at.pdf]

**Appendix 1** (as supplied by the authors): Resource-specific direct cost categories\*

---

- Endoscopy
  - Food services
  - Health Professionals (including occupational therapy, speech and language pathology, social work, recreational therapy, physiotherapy, respiratory services)
  - Imaging (including electro-diagnostics and non-invasive vascular imaging)
  - Laboratory
  - Nursing costs (including ward, non-ward [emergency, hemodialysis], and intensive care unit)
  - Operating Room
  - Operating Room Implants
  - Pharmacy
  - Post-anesthetic Care Unit
  - Special Care Unit (includes neonatal, coronary, and medical/surgical intensive care units)
- 

\*Adapted from the Ontario Quality-Based Procedures Groupings.<sup>1</sup>

**Reference**

1. Ontario case costing guide, version 9.0. Toronto: Data Standards Unit, Health Data Branch, Ministry of Health and Long-Term Care; 2014. Available upon request (info@occp.com).
